1 **Title**

2 **A Natural History of NAA15-related Neurodevelopmental Disorder Through Adolescence**

3 Rikhil Makwana<sup>1\*</sup>, Carolina Christ<sup>1\*</sup>, Elaine Marchi<sup>1</sup>, Randie Harpell<sup>1</sup>, Gholson J. Lyon<sup>1,2,3\*\*</sup>

4 <sup>1</sup>Department of Human Genetics, New York State Institute for Basic Research in Developmental  
5 Disabilities, Staten Island, New York, United States of America

6 <sup>2</sup>George A. Jervis Clinic, New York State Institute for Basic Research in Developmental  
7 Disabilities, Staten Island, New York, United States of America

8 <sup>3</sup>Biology PhD Program, The Graduate Center, The City University of New York, New York,  
9 United States of America

10

11 **Abstract**

12 NAA15 is a member of the NatA N-terminal acetyltransferase complex which acts by  
13 interacting with the NAA10 enzymatic sub-unit. Individuals with variants in the NAA15 coding  
14 region develop NAA15-related neurodevelopmental syndrome which presents with a wide array  
15 of manifestations that affect the heart, brain, musculoskeletal system, and behavioral and  
16 cognitive development. We tracked a cohort of 26 participants (8 females and 18 males) over  
17 time, each with a pathogenic NAA15 variant, and administered the Vineland-3 assessment to  
18 them to assess their adaptive functioning. We found that the cohort performed significantly  
19 worse compared to the normalized Vineland values. On average, females performed better than  
20 males across all domains. They performed significantly better on the Motor Domain and Fine  
21 Motor Sub-Domain portions of the assessment. Over time, females showed a decrease in  
22 adaptive functioning with the decline being especially strongly correlated at the Coping sub-  
23 domain, Domestic sub-domain, and Fine motor sub-domains. It is difficult to determine the

24 strength of these correlations due to limited power. Males (after excluding one outlier) showed a  
25 moderate positive correlation between age and ABC standard score. Ultimately, additional  
26 longitudinal data should be collected to determine the validity of the between sex-differences and  
27 to better understand the change in adaptive behavioral outcomes of individuals with NAA15-  
28 neurodevelopmental disorder as they age.

## 29 **Introduction**

30 N-terminal acetylation is a prevalent protein modification that involves the addition of an  
31 acetyl group to the alpha-amino group of the N-terminal amino acid of a protein (Liszcak et al.,  
32 2013). This enzymatic process is catalyzed by a group of N-terminal acetyltransferases (NATs)  
33 and plays a pivotal role in various cellular processes, including protein stability, protein-protein  
34 interactions, and cellular localization (Aksnes et al., 2015; Bienvenut et al., 2012; Dikiy &  
35 Eliezer, 2014). There are seven known NAT types, with NatA being the most prominent, believed  
36 to be responsible for modifying 40-50% of the human proteome (Deng et al., 2019; Feng & Ma,  
37 2016; Van Damme, 2021). The NatA complex is composed of the catalytic sub-unit NAA10, and  
38 the auxiliary sub-units NAA15 and HYPK (Deng et al., 2019; Dörfel et al., 2017; Feng et al.,  
39 2016; Knorr et al., 2019; Weidenhausen et al., 2021).

40 Dysregulation of NAA10 and NAA15 expression or activity has been associated with the  
41 pathogenesis of various diseases, including cancer (Kuhns et al., 2018; Le et al., 2023; Zhang et  
42 al., 2020; Zhu et al., 2024), neurodevelopmental disorders (Cheng et al., 2018; Lyon et al., 2023;  
43 Makwana et al., 2024; Sidhu et al., 2017; Wu & Lyon, 2018), and cardiovascular diseases  
44 (Belbachir et al., 2023; Huth et al., 2023; Ritter et al., 2021; Støve et al., 2018; Ward et al.,  
45 2021). More notably, mutations in the X-linked gene NAA10 lead to Ogden Syndrome, which  
46 has numerous effects on individual's development and overall health. NAA15-related

47 neurodevelopmental syndrome has overlapping symptoms with Ogden Syndrome, including  
48 intellectual disability, atypical or delayed development, heart anomalies, and more features  
49 previously described (Cheng et al., 2020; Dörfel & Lyon, 2015; Lyon et al., 2023; McTiernan et  
50 al., 2018; Myklebust et al., 2015; Patel et al., 2024; Pesz et al., 2018; Stessman et al., 2017;  
51 Støve et al., 2018; Umlai et al., 2021; Wong et al., 2019; Zhao et al., 2018). Additionally,  
52 NAA15 variants are associated with musculoskeletal and neuromuscular abnormalities that can  
53 appear in childhood or may have a delayed appearance until adulthood (Danti et al., 2024;  
54 Monestier et al., 2019; Pesz et al., 2018; Tian et al., 2022; Yubero et al., 2022).

55         The aim of the current study is to further describe adaptive functioning in individuals  
56 with NAA15-related neurodevelopmental syndrome by analyzing prospective data and  
57 understand how this disorder progresses over time.

## 58 **Methods**

### 59 Participants

60         All families that participated in the investigation signed Institutional Review Board  
61 (IRB)-approved consents and HIPAA forms. The scope of the project was explained in lay  
62 language. The participant population included children with NAA15 pathogenic variants that the  
63 principal investigator has previously worked with for other research projects. Participants were  
64 not compensated for their time. Overall, there were 26 participants who were administered the  
65 assessment.

### 66 Cognitive Assessment

67         The participants were administered Vineland-3 which is composed of three core domains:  
68 Communication Daily Living Skills, and Socialization. These domains are further split into sub-

69 domains that are used to assess an individual's competency in tasks of personal and social  
70 sufficiency (Perry et al., 2009). The scores for each core domain are norm referenced and  
71 summed to generate an Adaptive Behavior composite (ABC) score that provides a holistic  
72 picture of an individual's adaptive behavior across domains. The Vineland 3 tools were  
73 administered by three trained assessors at various timepoints in the participants' lives ranging  
74 from 1-23 years old. Individual assessor scores were cross validated with one another to ensure  
75 equivalency in how assessments were administered and scored. Participant caregivers were those  
76 interviewed due to their proximity and knowledge of the patients. Participants were given access  
77 to the Vineland assessment scores after they had been scored.

## 78 Analysis

79 The Principal Investigator and associated staff collected at least one Vineland 3 score for  
80 each participant over multiple years. Some participants were able to take the assessment more  
81 than once providing a longitudinal outlook. Natural history analysis and visualization was then  
82 performed using the GraphPad Prism software. All pathogenic variants were analyzed together  
83 and graphed by comparing their ABC standard score against the age at which the assessment was  
84 administered. Further analysis was performed by filtering graphs by sex. All pathogenic variants,  
85 male participants, and female participants were also graphed according to their Communication  
86 (com), Daily Living Skills (dls), Social (soc), and Motor (mot) domain standard scores. The  
87 domain scores were further broken down by sub-domain standard score to allow for more  
88 granular identification of participant strength and weakness over time. The Communication sub-  
89 domain scores were Receptive (rec), Expressive (exp), and Written (wrn). The Daily Living  
90 Skills sub-domains analyzed were Personal (per), Domestic (dom), and Community (cmm). The  
91 Socialization sub-domains of interest were Interpersonal Relationships (ipr), Play and Leisure

92 (pla), and Coping Skills (cop). The Motor sub-domains of Interest were Fine Motor (fmo) and  
93 Gross Motor (gmo). Scores were only collected and included for this motor domain if patients  
94 were under the age of nine to stay within the validated age range of the exam (Perry et al., 2009).  
95 Lastly, the Internalizing (int) and Externalizing (ext) sub-domain components of the Maladaptive  
96 Trait domain were also included in analysis, however the Critical Items component of the  
97 domain were not.

98 The scores were compared in Microsoft Excel with two-tailed equal variance t-tests to  
99 compare the adaptive behavior outcomes between males and females to determine if there were  
100 sex differences. The p-value was set at .05 for all calculations. Correlation coefficients were also  
101 calculated for each of the graphs made using Excel. A second round of calculations for the t-test  
102 and the correlation coefficients in the male cohort was performed to exclude NAA15-011 due to  
103 being three standard deviations above the mean in age compared to the other participants and  
104 having performed two standard deviations below the mean in Vineland ABC, Motor, Social, and  
105 Daily Living Skills standard scores. Data presented in tables includes calculations performed  
106 including participant NAA15-011 unless otherwise specified.

## 107 **Results**

108 There were 26 participants who were administered the Vineland and included in this  
109 study. A breakdown of the different pathogenic variants in each sex can be seen in **Table 1**.  
110 Males and females each had unique pathogenic variants. Twenty-four participants developed  
111 their variant *de novo* and 2 participants have variants of unknown origin (due to the parents not  
112 being tested). Of the 26 participants, 8 are female and 18 are male with the age range being from  
113 ~0 to ~25 years old (mean = 8.8 years, standard deviation (SD) = 4.6).

114 Compared to the general population, individuals with NAA15 variants scored below  
115 average on the Vineland 3 Assessment (where average is mean=100, sd=15). This was true for  
116 ABC standard scores as well as the main domain scores. The average ABC score among NAA15  
117 variants was 66.7 (SD = 21.1). Females tended to outperform males across adaptive behavior  
118 domains. However, except for the Motor domain score these differences were not significant. A  
119 summary of the Vineland 3 scores can be seen in **Table 2**.

120 Graphical representations of the ABC standard scores over time can be seen in **Figure 1**.  
121 Before stratifying by sex, there appears to be an overall downward trend in score with age.  
122 **Figure 2** shows the ABC standard scores separated by male and female. Separation by sex shows  
123 a moderate linear increase in adaptive function in males over time, when excluding NAA15-011,  
124 whereas females appear to show a moderately strong linear decay. There is also a strong linear  
125 decay in the female Daily Living Skills domain over times whereas the males showed a moderate  
126 positive linear growth when excluding NAA15-011. **Table 3** showcases the remaining calculated  
127 correlation coefficient values for the Vineland ABC and Domain standard scores for the females,  
128 males, and males excluding NAA15-011.

129 The Communication, Daily Living Skills, Social, and Motor standard score graphs can be  
130 seen in **Figure 3** and follow similar trends for females and males, when excluding NAA15-011,  
131 as the ABC scores over time. It should be noted that excluding NAA15-011 did not significantly  
132 change the t-test statistics of the standard scores when comparing the males and the females. The  
133 magnitude at which the females outperformed the males decreased. However, except for the  
134 Motor domain score, their differences were still not significant.

135 Dividing the Motor domain into its Fine Motor and Gross Motor sub-domains elucidated  
136 the difference between sexes. Males, with and without the inclusion of NAA15-011, on average

137 scored 7.0 (SD = 2.5) which is significantly less than the females who had an average score of  
138 14.0 (SD = 3.6). On average for Gross Motor subdomain scores, Males (mean = 8.5, SD = 3.5)  
139 also performed worse than their female counterparts (mean = 10.8, SD = 1.8). This difference  
140 was not significant. There were no other significant differences between how the sexes  
141 performed in the various sub-domains. A summary of the breakdown of each domain into its sub-  
142 domain components can be seen in **Table 4**.

143 Each domain sub-domain score can be seen in **Figure 4**. There are strong negative linear  
144 associations between the Coping, Fine Motor, and Domestic sub-domains over time in the  
145 NAA15 females. There are also moderately strong negative linear associations in the Receptive  
146 and Personal sub domains. The correlation coefficients in the males were not as strong as those  
147 in the females. However, when excluding NAA15-011, the Personal sub-domain had a moderate  
148 positive linear relationship over time. Calculated correlation coefficients for each sub-domain  
149 can be seen in **Table 5**.

## 150 **Discussion**

151 Individuals with NAA15-related neurodevelopmental syndrome performed significantly  
152 worse than the mean on the Vineland 3. This difference was expected due to the expression of the  
153 NatA complex being ubiquitous across tissue types and playing a prominent role in development  
154 (Cheng et al., 2020; Liszczak et al., 2013; Lyon et al., 2023). When comparing performance by  
155 sex, the females on average performed better than the males. Except for two participants with an  
156 unknown inheritance pattern, the *NAA15* pathogenic variants in the study cohort occurred de-  
157 novo. Without evidence that the disease is maternally inherited, the difference in sex is  
158 unexpected. A possible explanation could be that the NAA10 catalytic subunit of the NatA  
159 complex is present on the X-chromosome (Bader et al., 2020; Lyon et al., 2023; Rope et al.,

160 2011; Wu & Lyon, 2018). An increase in NAA10 dosage due to partial inactivation or a different  
161 X-chromosome escape mechanism could partially offset the loss of active site conformational  
162 change of NAA10 by NAA15 (Carrel & Willard, 2005; Cotton et al., 2013; Schultz et al., 2015;  
163 Tukiainen et al., 2017). The mechanism of NAA15-related neurodevelopmental syndrome  
164 appearing to be a milder form of NAA10-related neurodevelopmental syndrome (Ogden  
165 Syndrome) also provides some support for this hypothesis as the NAA10 catalytic unit has  
166 function outside of the NatA complex but is unable to acetylate NatA specific sites without  
167 NAA15 (Cheng et al., 2020; Lyon et al., 2023; Makwana et al., 2024; Patel et al., 2024; Wu &  
168 Lyon, 2018). However, the differences seen between sexes could also be due to small sample  
169 sizes. Also, because of a lack of overlap between pathogenic variants in males and females, it  
170 was not possible to do a direct comparison in function while controlling for sex. Further genetic  
171 analysis and cognitive testing needs to be performed to determine if the differences between  
172 sexes are significant.

173         While females performed on average better than males across all adaptive domains, they  
174 performed significantly better on the motor domain and fine motor sub-domain portions of the  
175 Vineland. Pathogenic variants in NAA15 have been associated with infant onset dystonia in a  
176 few individuals (Cheng et al., 2018; Danti et al., 2024; Lyon et al., 2023; Yubero et al., 2022)  
177 which could be one reason why the cohort performed worse on motor tasks compared to the  
178 norm population. However, there did not appear to be a difference between the sexes in the  
179 referenced literature in how musculoskeletal manifestations presented. Furthermore, there is a  
180 case where a NAA15 variant led to the adult-onset presentation of parkinsonism in a man  
181 presenting with other manifestations of NAA15-related neurodevelopmental syndrome such as  
182 speech delay and intellectual disability (Straka et al., 2022). Continued genetic testing of



183 individuals with adult-onset dystonia and longitudinal monitoring of the current cohort for motor  
184 disorders will be necessary to help determine if the difference in motor function between male  
185 and females is due to chance, sex differences, or pathogenic variant type.

186         In aggregate, it is difficult to determine if there is an overall increase or decrease in  
187 function over time in the participants. However, when comparing performance by sex, there is a  
188 strong negative correlation between adaptive behavior in females and age. The decline with age  
189 has the strongest correlation between the coping, domestic, and fine motor sub-domains. With a  
190 decline in fine motor capacity, it would stand to reason that an individual's ability to take care of  
191 oneself (domestic) would also decline. However, both the domestic and fine motor sub-domains  
192 have age restrictions leading to unequal administration of those portions of the exam creating an  
193 even smaller population size to compare from (Farmer et al., 2020; Perry et al., 2009, p. 3).  
194 Furthermore, this decline in function contradicts the mild recovery in gross motor, personal-  
195 social, and language development function previously reported in the literature (Cheng et al.,  
196 2018, 2020; Tian et al., 2022). The decline in the coping sub-domain in the females could also be  
197 partially explained by the decrease in motor skills as there is evidence that similar motor declines  
198 present in those with Autism Spectrum Disorder (ASD) have led to decreased coping and  
199 socialization skills overall (Peyre et al., 2024; Raditha et al., 2023). The overall decline could  
200 also be partially explained by the upper half of the age range being from 11-17, a time period that  
201 is traditionally tumultuous for adolescents due to various physical and hormonal changes, and is  
202 associated with increased stress for those with ASD (Cridland et al., 2014; Steward et al., 2018;  
203 Tager-Flusberg & Kasari, 2013). Ultimately, follow up studies need to be performed on this  
204 cohort to determine if they are continuing to show decline over time, if there is a bottoming out  
205 effect, or if they begin to improve after navigating adolescence.

206 In contrast to the female decline over time, males when analyzed without NAA15-011 are  
207 correlated to have a moderate increase in adaptive function with age. However, there are not  
208 strong correlations present in any subsequent sub-domain analysis performed. Additionally, when  
209 including NAA15-011, there were no or small correlations between Vineland score and age.

210 Patient NAA15-011 was removed from the analysis due to their having performed much  
211 more poorly than the rest of their cohort. They had a *de novo* p.Asn864Ser pathogenic variant  
212 which is located in part of the region (residues 500-866 (Arnesen et al., 2010)) that interacts with  
213 the HYPK chaperone like protein which is important for NatA mediated acetylation and  
214 Huntingtin protein aggregation (Arnesen et al., 2010; Ghosh & Ranjan, 2022; Mikláňková et al.,  
215 2022; Weyer et al., 2017). In addition to dysfunctional N-terminal acetylation being associated  
216 with neurodevelopmental delay, abnormal Huntingtin protein aggregation also can lead to  
217 cognitive decline (Alberti & Hyman, 2021; Liu et al., 2023; Soltani Khaboushan et al., 2023).  
218 The stark difference in function between NAA15-011 and the rest of the male cohort could be  
219 explained by a substantial decrease in HYPK interaction. However, additional molecular testing  
220 would need to be conducted to be certain due to others in the cohort having mutations in this  
221 cohort without having similar decreases in function. If abnormally aggregated Huntingtin protein  
222 is associated with the steeper decline in function in patient NAA15-011, then future potential  
223 therapies that are effective in decreasing Huntingtin aggregation could possible rescue partial  
224 function in these individuals (Im et al., 2015; Jain & Roy, 2023; Posey et al., 2018; Roth et al.,  
225 2023). The increase in age could also be the reason for the sharp decline in function as NAA15-  
226 011 is 10 years older than the second oldest male. However, additional longitudinal data needs to  
227 be collected before definitive conclusions can be drawn.

228           The overall decrease in female adaptive behavior scores and the overall significantly  
229 decreased male adaptive scores suggest that there is an urgent need for additional study of and  
230 the development of interventions for NAA15-related neurodevelopmental disorder. Future  
231 research should aim to complete the clinical timeline as best as possible. The present cohort was  
232 only able to include individuals up to the age of ~20-24 years due to the rarity of the disease.  
233 Without insight into the later stages of the disorder, it will be more difficult for clinicians to help  
234 provide expectations of what to expect at different life stages to caregivers.

235           NAA15-related neurodevelopmental disorder is thought to be caused by  
236 haploinsufficiency (Cheng et al., 2018; Tian et al., 2022) of which there are several therapies in  
237 development that show promise in cell lines and animal models that have been used in similar  
238 disorders such as Rett Syndrome and Angelman Syndrome to help restore protein function and  
239 dosage to adequate levels (Albadri et al., 2017; Burbano et al., 2022; Hill & Meisler, 2021;  
240 Milazzo et al., 2021; Palmieri et al., 2023; Protic et al., 2019). If interventions are implemented  
241 early enough, it may be possible to restore protein function and improve adaptive behavior skills.

## 242 **Conclusion**

243           NAA15-related neurodevelopmental disorder is closely related to Ogden Syndrome  
244 (NAA10-related neurodevelopmental disorder) due to both the NAA15 and NAA10 proteins  
245 being part of the NatA complex. NAA15 plays a supporting role in complex with the NAA10  
246 enzymatic subunit, with dysfunction leading to clinical manifestations in the heart,  
247 musculoskeletal system, and brain. The pathogenic variants in NAA15-related  
248 neurodevelopmental disorder are heterozygous, so there is still one functioning copy of NAA15,  
249 meaning that the NatA complex can still form, but likely with haploinsufficiency. As such,  
250 NAA15 pathogenic variants usually present less severely than those persons with pathogenic

251 NAA10 variants. Repeated Vineland-3 administration to a cohort of 26 patients with unique *de*  
252 *novo* NAA15 pathogenic variants has revealed the natural history of the disease, showcasing an  
253 overall decrease in adaptive functioning compared to the norm from infancy till adolescence.  
254 Females tended to perform on average better than males. However, over time, females tended to  
255 show a decline in function whereas males showed an increase. Additional natural history studies  
256 need to be performed to understand disease outcomes outside of adolescence, difference between  
257 sexes, and to identify outliers who perform significantly better or worse than their peers so  
258 genetic or environmental factors influencing disease can be identified.

259

## 260 **Ethical Approval**

261 Both oral and written patient consent were obtained for research and publication, with  
262 approval of protocol #7659 for the Jervis Clinic by the New York State Psychiatric Institute -  
263 Columbia University Department of Psychiatry Institutional Review Board.

264

## 265 **Funding**

266 This work is supported by New York State Office for People with Developmental  
267 Disabilities (OPWDD) and NIH NIGMS R35-GM-133408.

268

## 269 **Competing Interests**

270 The authors declare that they have no competing interests or personal relationships that  
271 could have influenced the work reported in this paper.

272

273

274 **References**

- 275 Aksnes, H., Hole, K., & Arnesen, T. (2015). Molecular, cellular, and physiological significance of N-  
276 terminal acetylation. *International Review of Cell and Molecular Biology*, 316, 267–305.  
277 <https://doi.org/10.1016/bs.ircmb.2015.01.001>
- 278 Albadri, S., Del Bene, F., & Revenu, C. (2017). Genome editing using CRISPR/Cas9-based knock-in  
279 approaches in zebrafish. *Methods (San Diego, Calif.)*, 121–122, 77–85.  
280 <https://doi.org/10.1016/j.ymeth.2017.03.005>
- 281 Alberti, S., & Hyman, A. A. (2021). Biomolecular condensates at the nexus of cellular stress, protein  
282 aggregation disease and ageing. *Nature Reviews. Molecular Cell Biology*, 22(3), 196–213.  
283 <https://doi.org/10.1038/s41580-020-00326-6>
- 284 Arnesen, T., Starheim, K. K., Van Damme, P., Evjenth, R., Dinh, H., Betts, M. J., Ryningen, A.,  
285 Vandekerckhove, J., Gevaert, K., & Anderson, D. (2010). The Chaperone-Like Protein HYPK  
286 Acts Together with NatA in Cotranslational N-Terminal Acetylation and Prevention of Huntingtin  
287 Aggregation. *Molecular and Cellular Biology*, 30(8), 1898–1909.  
288 <https://doi.org/10.1128/MCB.01199-09>
- 289 Bader, I., McTiernan, N., Darbakk, C., Boltshauser, E., Ree, R., Ebner, S., Mayr, J. A., & Arnesen, T.  
290 (2020). Severe syndromic ID and skewed X-inactivation in a girl with NAA10 dysfunction and a  
291 novel heterozygous de novo NAA10 p.(His16Pro) variant—A case report. *BMC Medical  
292 Genetics*, 21(1), 153. <https://doi.org/10.1186/s12881-020-01091-1>
- 293 Belbachir, N., Wu, Y., Shen, M., Zhang, S. L., Zhang, J. Z., Liu, C., Knollmann, B. C., Lyon, G. J., Ma,  
294 N., & Wu, J. C. (2023). Studying Long QT Syndrome Caused by NAA10 Genetic Variants Using  
295 Patient-Derived Induced Pluripotent Stem Cells. *Circulation*, 148(20), 1598–1601.  
296 <https://doi.org/10.1161/CIRCULATIONAHA.122.061864>
- 297 Bienvenut, W. V., Sumpton, D., Martinez, A., Lilla, S., Espagne, C., Meinnel, T., & Giglione, C. (2012).  
298 Comparative large scale characterization of plant versus mammal proteins reveals similar and

299 idiosyncratic N- $\alpha$ -acetylation features. *Molecular & Cellular Proteomics: MCP*, 11(6),  
300 M111.015131. <https://doi.org/10.1074/mcp.M111.015131>

301 Burbano, L. E., Li, M., Jancovski, N., Jafar-Nejad, P., Richards, K., Sedo, A., Soriano, A., Rollo, B., Jia,  
302 L., Gazina, E. V., Piltz, S., Adikusuma, F., Thomas, P. Q., Kopsidas, H., Rigo, F., Reid, C. A.,  
303 Maljevic, S., & Petrou, S. (2022). Antisense oligonucleotide therapy for KCNT1 encephalopathy.  
304 *JCI Insight*, 7(23), e146090. <https://doi.org/10.1172/jci.insight.146090>

305 Carrel, L., & Willard, H. F. (2005). X-inactivation profile reveals extensive variability in X-linked gene  
306 expression in females. *Nature*, 434(7031), 400–404. <https://doi.org/10.1038/nature03479>

307 Cheng, H., Dharmadhikari, A. V., Varland, S., Ma, N., Domingo, D., Kleyner, R., Rope, A. F., Yoon, M.,  
308 Stray-Pedersen, A., Posey, J. E., Crews, S. R., Eldomery, M. K., Akdemir, Z. C., Lewis, A. M.,  
309 Sutton, V. R., Rosenfeld, J. A., Conboy, E., Agre, K., Xia, F., ... Lyon, G. J. (2018). Truncating  
310 Variants in NAA15 Are Associated with Variable Levels of Intellectual Disability, Autism  
311 Spectrum Disorder, and Congenital Anomalies. *American Journal of Human Genetics*, 102(5),  
312 985–994. <https://doi.org/10.1016/j.ajhg.2018.03.004>

313 Cheng, H., Gottlieb, L., Marchi, E., Kleyner, R., Bhardwaj, P., Rope, A. F., Rosenheck, S., Moutton, S.,  
314 Philippe, C., Eyaid, W., Alkuraya, F. S., Toribio, J., Mena, R., Prada, C. E., Stessman, H., Bernier,  
315 R., Wermuth, M., Kauffmann, B., Blaumeiser, B., ... Lyon, G. J. (2020). Phenotypic and  
316 biochemical analysis of an international cohort of individuals with variants in NAA10 and  
317 NAA15. *Human Molecular Genetics*, 29(5), 877–878. <https://doi.org/10.1093/hmg/ddz173>

318 Cotton, A. M., Ge, B., Light, N., Adoue, V., Pastinen, T., & Brown, C. J. (2013). Analysis of expressed  
319 SNPs identifies variable extents of expression from the human inactive X chromosome. *Genome*  
320 *Biology*, 14(11), R122. <https://doi.org/10.1186/gb-2013-14-11-r122>

321 Cridland, E. K., Jones, S. C., Caputi, P., & Magee, C. A. (2014). Being a girl in a boys' world:  
322 Investigating the experiences of girls with autism spectrum disorders during adolescence. *Journal*  
323 *of Autism and Developmental Disorders*, 44(6), 1261–1274. <https://doi.org/10.1007/s10803-013->  
324 1985-6

325 Danti, F. R., Sarmiento, I. J. K., Moloney, P. B., Colangelo, I., Graziola, F., Garavaglia, B., Zorzi, G.,  
326 Mencacci, N. E., & Lubbe, S. J. (2024). Childhood-Onset Lower Limb Focal Dystonia Due to a  
327 NAA15 Variant: A Case Report. *Movement Disorders: Official Journal of the Movement Disorder*  
328 *Society*. <https://doi.org/10.1002/mds.29732>

329 Deng, S., Magin, R. S., Wei, X., Pan, B., Petersson, E. J., & Marmorstein, R. (2019). Structure and  
330 Mechanism of Acetylation by the N-Terminal Dual Enzyme NatA/Naa50 Complex. *Structure*  
331 *(London, England: 1993)*, 27(7), 1057-1070.e4. <https://doi.org/10.1016/j.str.2019.04.014>

332 Dikiy, I., & Eliezer, D. (2014). N-terminal Acetylation Stabilizes N-terminal Helicity in Lipid- and  
333 Micelle-bound  $\alpha$ -Synuclein and Increases Its Affinity for Physiological Membranes. *Journal of*  
334 *Biological Chemistry*, 289(6), 3652–3665. <https://doi.org/10.1074/jbc.M113.512459>

335 Dörfel, M. J., Fang, H., Crain, J., Klingener, M., Weiser, J., & Lyon, G. J. (2017). Proteomic and genomic  
336 characterization of a yeast model for Ogden syndrome. *Yeast (Chichester, England)*, 34(1), 19–37.  
337 <https://doi.org/10.1002/yea.3211>

338 Dörfel, M. J., & Lyon, G. J. (2015). The biological functions of Naa10—From amino-terminal acetylation  
339 to human disease. *Gene*, 567(2), 103–131. <https://doi.org/10.1016/j.gene.2015.04.085>

340 Farmer, C., Adedipe, D., Bal, V. H., Chlebowski, C., & Thurm, A. (2020). Concordance of the Vineland  
341 Adaptive Behavior Scales, second and third editions. *Journal of Intellectual Disability Research:*  
342 *JIDR*, 64(1), 18–26. <https://doi.org/10.1111/jir.12691>

343 Feng, J., Li, R., Yu, J., Ma, S., Wu, C., Li, Y., Cao, Y., & Ma, L. (2016). Protein N-terminal acetylation is  
344 required for embryogenesis in Arabidopsis. *Journal of Experimental Botany*, 67(15), 4779–4789.  
345 <https://doi.org/10.1093/jxb/erw257>

346 Feng, J., & Ma, L. (2016). NatA is required for suspensor development in Arabidopsis. *Plant Signaling &*  
347 *Behavior*, 11(10), e1231293. <https://doi.org/10.1080/15592324.2016.1231293>

348 Ghosh, D. K., & Ranjan, A. (2022). HYPK coordinates degradation of polyneddylated proteins by  
349 autophagy. *Autophagy*, 18(8), 1763–1784. <https://doi.org/10.1080/15548627.2021.1997053>

350 Hill, S. F., & Meisler, M. H. (2021). Antisense Oligonucleotide Therapy for Neurodevelopmental  
351 Disorders. *Developmental Neuroscience*, 43(3–4), 247–252. <https://doi.org/10.1159/000517686>

352 Huth, E. A., Zhao, X., Owen, N., Luna, P. N., Vogel, I., Dorf, I. L. H., Joss, S., Clayton-Smith, J., Parker,  
353 M. J., Louw, J. J., Gewillig, M., Breckpot, J., Kraus, A., Sasaki, E., Kini, U., Burgess, T., Tan, T.  
354 Y., Armstrong, R., Neas, K., ... Scott, D. A. (2023). Clinical exome sequencing efficacy and  
355 phenotypic expansions involving anomalous pulmonary venous return. *European Journal of*  
356 *Human Genetics: EJHG*, 31(12), 1430–1439. <https://doi.org/10.1038/s41431-023-01451-4>

357 Im, W., Ban, J.-J., Chung, J.-Y., Lee, S.-T., Chu, K., & Kim, M. (2015). Multidrug resistance protein 1  
358 reduces the aggregation of mutant huntingtin in neuronal cells derived from the Huntington's  
359 disease R6/2 model. *Scientific Reports*, 5(1), 16887. <https://doi.org/10.1038/srep16887>

360 Jain, S., & Roy, I. (2023). Aptamer Reduces Aggregation of Mutant Huntingtin and Rescues Proteostasis  
361 Network in Non-Neuronal and Neuronal Cells. *ACS Chemical Neuroscience*, 14(12), 2385–2395.  
362 <https://doi.org/10.1021/acscemneuro.3c00226>

363 Knorr, A. G., Schmidt, C., Tesina, P., Berninghausen, O., Becker, T., Beatrix, B., & Beckmann, R. (2019).  
364 Ribosome-NatA architecture reveals that rRNA expansion segments coordinate N-terminal  
365 acetylation. *Nature Structural & Molecular Biology*, 26(1), 35–39.  
366 <https://doi.org/10.1038/s41594-018-0165-y>

367 Kuhns, K. J., Zhang, G., Wang, Z., & Liu, W. (2018). ARD1/NAA10 acetylation in prostate cancer.  
368 *Experimental & Molecular Medicine*, 50(7), 1–8. <https://doi.org/10.1038/s12276-018-0107-0>

369 Le, M.-K., Vuong, H. G., Nguyen, T. T. T., & Kondo, T. (2023). NAA10 overexpression dictates distinct  
370 epigenetic, genetic, and clinicopathological characteristics in adult gliomas. *Journal of*  
371 *Neuropathology and Experimental Neurology*, 82(7), 650–658.  
372 <https://doi.org/10.1093/jnen/nlad037>

373 Liszczak, G., Goldberg, J. M., Foy, H., Petersson, E. J., Arnesen, T., & Marmorstein, R. (2013).  
374 Molecular basis for N-terminal acetylation by the heterodimeric NatA complex. *Nature Structural*  
375 *& Molecular Biology*, 20(9), 1098–1105. <https://doi.org/10.1038/nsmb.2636>



376 Liu, L., Tong, H., Sun, Y., Chen, X., Yang, T., Zhou, G., Li, X.-J., & Li, S. (2023). Huntingtin Interacting  
377 Proteins and Pathological Implications. *International Journal of Molecular Sciences*, 24(17),  
378 13060. <https://doi.org/10.3390/ijms241713060>

379 Lyon, G. J., Vedaie, M., Beisheim, T., Park, A., Marchi, E., Gottlieb, L., Hsieh, T.-C., Klinkhammer, H.,  
380 Sandomirsky, K., Cheng, H., Starr, L. J., Preddy, I., Tseng, M., Li, Q., Hu, Y., Wang, K.,  
381 Carvalho, A., Martinez, F., Caro-Llopis, A., ... Herr-Israel, E. (2023). Expanding the phenotypic  
382 spectrum of NAA10-related neurodevelopmental syndrome and NAA15-related  
383 neurodevelopmental syndrome. *European Journal of Human Genetics: EJHG*, 31(7), 824–833.  
384 <https://doi.org/10.1038/s41431-023-01368-y>

385 Makwana, R., Christ, C., Marchi, E., Harpell, R., & Lyon, G. J. (2024). Longitudinal Adaptive Behavioral  
386 Outcomes in Ogden Syndrome by Seizure Status and Therapeutic Intervention. *medRxiv: The*  
387 *Preprint Server for Health Sciences*, 2024.02.23.24303144.  
388 <https://doi.org/10.1101/2024.02.23.24303144>

389 McTiernan, N., Støve, S. I., Aukrust, I., Mårli, M. T., Myklebust, L. M., Houge, G., & Arnesen, T. (2018).  
390 NAA10 dysfunction with normal NatA-complex activity in a girl with non-syndromic ID and a de  
391 novo NAA10 p.(V111G) variant—A case report. *BMC Medical Genetics*, 19(1), 47.  
392 <https://doi.org/10.1186/s12881-018-0559-z>

393 Miklánková, P., Linster, E., Boyer, J.-B., Weidenhausen, J., Mueller, J., Armbruster, L., Lapouge, K., De  
394 La Torre, C., Bienvenut, W., Sticht, C., Mann, M., Meinnel, T., Sinning, I., Giglione, C., Hell, R.,  
395 & Wirtz, M. (2022). HYPK promotes the activity of the Na<sup>+</sup>-acetyltransferase A complex to  
396 determine proteostasis of nonAc-X2/N-degron-containing proteins. *Science Advances*, 8(24),  
397 eabn6153. <https://doi.org/10.1126/sciadv.abn6153>

398 Milazzo, C., Mientjes, E. J., Wallaard, I., Rasmussen, S. V., Erichsen, K. D., Kakunuri, T., van der Sman,  
399 A. S. E., Kremer, T., Miller, M. T., Hoener, M. C., & Elgersma, Y. (2021). Antisense  
400 oligonucleotide treatment rescues UBE3A expression and multiple phenotypes of an Angelman  
401 syndrome mouse model. *JCI Insight*, 6(15), e145991. <https://doi.org/10.1172/jci.insight.145991>

402 Monestier, O., Landemaine, A., Bugeon, J., Rescan, P.-Y., & Gabillard, J.-C. (2019). Naa15 knockdown  
403 enhances c2c12 myoblast fusion and induces defects in zebrafish myotome morphogenesis.  
404 *Comparative Biochemistry and Physiology. Part B, Biochemistry & Molecular Biology*, 228, 61–  
405 67. <https://doi.org/10.1016/j.cbpb.2018.11.005>

406 Myklebust, L. M., Van Damme, P., Støve, S. I., Dörfel, M. J., Abboud, A., Kalvik, T. V., Grauffel, C.,  
407 Jonckheere, V., Wu, Y., Swensen, J., Kaasa, H., Liszczak, G., Marmorstein, R., Reuter, N., Lyon,  
408 G. J., Gevaert, K., & Arnesen, T. (2015). Biochemical and cellular analysis of Ogden syndrome  
409 reveals downstream Nt-acetylation defects. *Human Molecular Genetics*, 24(7), 1956–1976.  
410 <https://doi.org/10.1093/hmg/ddu611>

411 Palmieri, M., Pozzer, D., & Landsberger, N. (2023). Advanced genetic therapies for the treatment of Rett  
412 syndrome: State of the art and future perspectives. *Frontiers in Neuroscience*, 17, 1172805.  
413 <https://doi.org/10.3389/fnins.2023.1172805>

414 Patel, R., Park, A. Y., Marchi, E., Gropman, A. L., Whitehead, M. T., & Lyon, G. J. (2024). Ophthalmic  
415 Manifestations of NAA10-Related and NAA15-Related Neurodevelopmental Syndrome:  
416 Analysis of Cortical Visual Impairment and Refractive Errors. *medRxiv: The Preprint Server for*  
417 *Health Sciences*, 2024.02.01.24302161. <https://doi.org/10.1101/2024.02.01.24302161>

418 Perry, A., Flanagan, H. E., Dunn Geier, J., & Freeman, N. L. (2009). Brief report: The Vineland Adaptive  
419 Behavior Scales in young children with autism spectrum disorders at different cognitive levels.  
420 *Journal of Autism and Developmental Disorders*, 39(7), 1066–1078.  
421 <https://doi.org/10.1007/s10803-009-0704-9>

422 Pesz, K., Pienkowski, V. M., Pollak, A., Gasperowicz, P., Sykulski, M., Kosińska, J., Kiszko, M.,  
423 Krzykwa, B., Bartnik-Głaska, M., Nowakowska, B., Rydzanicz, M., Sasiadek, M. M., & Płoski,  
424 R. (2018). Phenotypic consequences of gene disruption by a balanced de novo translocation  
425 involving SLC6A1 and NAA15. *European Journal of Medical Genetics*, 61(10), 596–601.  
426 <https://doi.org/10.1016/j.ejmg.2018.03.013>

427 Peyre, H., Peries, M., Madiou, E., David, A., Picot, M.-C., Pickles, A., & Baghdadli, A. (2024).  
428 Association of difficulties in motor skills with longitudinal changes in social skills in children  
429 with autism spectrum disorder: Findings from the ELENA French Cohort. *European Child &*  
430 *Adolescent Psychiatry*. <https://doi.org/10.1007/s00787-023-02324-3>

431 Posey, A. E., Ruff, K. M., Harmon, T. S., Crick, S. L., Li, A., Diamond, M. I., & Pappu, R. V. (2018).  
432 Profilin reduces aggregation and phase separation of huntingtin N-terminal fragments by  
433 preferentially binding to soluble monomers and oligomers. *Journal of Biological Chemistry*,  
434 *293*(10), 3734–3746. <https://doi.org/10.1074/jbc.RA117.000357>

435 Protic, D., Salcedo-Arellano, M. J., Dy, J. B., Potter, L. A., & Hagerman, R. J. (2019). New Targeted  
436 Treatments for Fragile X Syndrome. *Current Pediatric Reviews*, *15*(4), 251–258.  
437 <https://doi.org/10.2174/1573396315666190625110748>

438 Raditha, C., Handryastuti, S., Pusponegoro, H. D., & Mangunatmadja, I. (2023). Positive behavioral  
439 effect of sensory integration intervention in young children with autism spectrum disorder.  
440 *Pediatric Research*, *93*(6), 1667–1671. <https://doi.org/10.1038/s41390-022-02277-4>

441 Ritter, A., Berger, J. H., Deardorff, M., Izumi, K., Lin, K. Y., Medne, L., & Ahrens-Nicklas, R. C. (2021).  
442 Variants in NAA15 cause pediatric hypertrophic cardiomyopathy. *American Journal of Medical*  
443 *Genetics. Part A*, *185*(1), 228–233. <https://doi.org/10.1002/ajmg.a.61928>

444 Rope, A. F., Wang, K., Evjenth, R., Xing, J., Johnston, J. J., Swensen, J. J., Johnson, W. E., Moore, B.,  
445 Huff, C. D., Bird, L. M., Carey, J. C., Opitz, J. M., Stevens, C. A., Jiang, T., Schank, C., Fain, H.  
446 D., Robison, R., Dalley, B., Chin, S., ... Lyon, G. J. (2011). Using VAAST to identify an X-linked  
447 disorder resulting in lethality in male infants due to N-terminal acetyltransferase deficiency.  
448 *American Journal of Human Genetics*, *89*(1), 28–43. <https://doi.org/10.1016/j.ajhg.2011.05.017>

449 Roth, J. R., Moraes, R. C. M. de, Xu, B. P., Crawley, S. R., Khan, M. A., & Melkani, G. C. (2023).  
450 Rapamycin reduces neuronal mutant huntingtin aggregation and ameliorates locomotor  
451 performance in *Drosophila*. *Frontiers in Aging Neuroscience*, *15*.  
452 <https://doi.org/10.3389/fnagi.2023.1223911>

453 Schultz, M. D., He, Y., Whitaker, J. W., Hariharan, M., Mukamel, E. A., Leung, D., Rajagopal, N., Nery,  
454 J. R., Urich, M. A., Chen, H., Lin, S., Lin, Y., Jung, I., Schmitt, A. D., Selvaraj, S., Ren, B.,  
455 Sejnowski, T. J., Wang, W., & Ecker, J. R. (2015). Human body epigenome maps reveal  
456 noncanonical DNA methylation variation. *Nature*, *523*(7559), 212–216.  
457 <https://doi.org/10.1038/nature14465>

458 Sidhu, M., Brady, L., Tarnopolsky, M., & Ronen, G. M. (2017). Clinical Manifestations Associated With  
459 the N-Terminal-Acetyltransferase NAA10 Gene Mutation in a Girl: Ogden Syndrome. *Pediatric*  
460 *Neurology*, *76*, 82–85. <https://doi.org/10.1016/j.pediatrneurol.2017.07.010>

461 Soltani Khaboushan, A., Moeinafshar, A., Ersi, M. H., Teixeira, A. L., Majidi Zolbin, M., & Kajbafzadeh,  
462 A.-M. (2023). Circulating levels of inflammatory biomarkers in Huntington’s disease: A  
463 systematic review and meta-analysis. *Journal of Neuroimmunology*, *385*, 578243.  
464 <https://doi.org/10.1016/j.jneuroim.2023.578243>

465 Stessman, H. A. F., Xiong, B., Coe, B. P., Wang, T., Hoekzema, K., Fenckova, M., Kvarnung, M., Gerdts,  
466 J., Trinh, S., Cosemans, N., Vives, L., Lin, J., Turner, T. N., Santen, G., Ruivenkamp, C., Kriek,  
467 M., van Haeringen, A., Aten, E., Friend, K., ... Eichler, E. E. (2017). Targeted sequencing  
468 identifies 91 neurodevelopmental-disorder risk genes with autism and developmental-disability  
469 biases. *Nature Genetics*, *49*(4), 515–526. <https://doi.org/10.1038/ng.3792>

470 Steward, R., Crane, L., Mairi Roy, E., Remington, A., & Pellicano, E. (2018). “Life is Much More  
471 Difficult to Manage During Periods”: Autistic Experiences of Menstruation. *Journal of Autism*  
472 *and Developmental Disorders*, *48*(12), 4287–4292. <https://doi.org/10.1007/s10803-018-3664-0>

473 Støve, S. I., Blenski, M., Stray-Pedersen, A., Wierenga, K. J., Jhangiani, S. N., Akdemir, Z. C., Crawford,  
474 D., McTiernan, N., Myklebust, L. M., Purcarin, G., McNall-Knapp, R., Wadley, A., Belmont, J.  
475 W., Kim, J. J., Lupski, J. R., & Arnesen, T. (2018). A novel NAA10 variant with impaired  
476 acetyltransferase activity causes developmental delay, intellectual disability, and hypertrophic  
477 cardiomyopathy. *European Journal of Human Genetics: EJHG*, *26*(9), 1294–1305.  
478 <https://doi.org/10.1038/s41431-018-0136-0>

- 479 Straka, I., Švantnerová, J., Minár, M., Stanková, S., & Zech, M. (2022). Neurodevelopmental Gene-  
480 Related Dystonia-Parkinsonism with Onset in Adults: A Case with NAA15 Variant. *Movement*  
481 *Disorders: Official Journal of the Movement Disorder Society*, 37(9), 1955–1957.  
482 <https://doi.org/10.1002/mds.29125>
- 483 Tager-Flusberg, H., & Kasari, C. (2013). Minimally Verbal School-Aged Children with Autism Spectrum  
484 Disorder: The Neglected End of the Spectrum. *Autism Research : Official Journal of the*  
485 *International Society for Autism Research*, 6(6), 10.1002/aur.1329.  
486 <https://doi.org/10.1002/aur.1329>
- 487 Tian, Y., Xie, H., Yang, S., Shangguan, S., Wang, J., Jin, C., Zhang, Y., Cui, X., Lyu, Y., Chen, X., &  
488 Wang, L. (2022). Possible Catch-Up Developmental Trajectories for Children with Mild  
489 Developmental Delay Caused by NAA15 Pathogenic Variants. *Genes*, 13(3), 536.  
490 <https://doi.org/10.3390/genes13030536>
- 491 Tukiainen, T., Villani, A.-C., Yen, A., Rivas, M. A., Marshall, J. L., Satija, R., Aguirre, M., Gauthier, L.,  
492 Fleharty, M., Kirby, A., Cummings, B. B., Castel, S. E., Karczewski, K. J., Aguet, F., Byrnes, A.,  
493 Lappalainen, T., Aviv Regev, Ardlie, K. G., Hacohen, N., & MacArthur, D. G. (2017). Landscape  
494 of X chromosome inactivation across human tissues. *Nature*, 550(7675), 244–248.  
495 <https://doi.org/10.1038/nature24265>
- 496 Umlai, U.-K. I., Haris, B., Hussain, K., & Jithesh, P. V. (2021). Case Report: Phenotype-Gene Correlation  
497 in a Case of Novel Tandem 4q Microduplication With Short Stature, Speech Delay and  
498 Microcephaly. *Frontiers in Endocrinology*, 12, 783235.  
499 <https://doi.org/10.3389/fendo.2021.783235>
- 500 Van Damme, P. (2021). Charting the N-Terminal Acetylome: A Comprehensive Map of Human NatA  
501 Substrates. *International Journal of Molecular Sciences*, 22(19), 10692.  
502 <https://doi.org/10.3390/ijms221910692>
- 503 Ward, T., Tai, W., Morton, S., Impens, F., Van Damme, P., Van Haver, D., Timmerman, E., Venturini, G.,  
504 Zhang, K., Jang, M. Y., Willcox, J. A. L., Haghighi, A., Gelb, B. D., Chung, W. K., Goldmuntz,

505 E., Porter, G. A., Lifton, R. P., Brueckner, M., Yost, H. J., ... Seidman, J. G. (2021). Mechanisms  
506 of Congenital Heart Disease Caused by NAA15 Haploinsufficiency. *Circulation Research*,  
507 *128*(8), 1156–1169. <https://doi.org/10.1161/CIRCRESAHA.120.316966>

508 Weidenhausen, J., Kopp, J., Armbruster, L., Wirtz, M., Lapouge, K., & Sinning, I. (2021). Structural and  
509 functional characterization of the N-terminal acetyltransferase Naa50. *Structure (London,*  
510 *England: 1993)*, *29*(5), 413-425.e5. <https://doi.org/10.1016/j.str.2020.12.004>

511 Weyer, F. A., Gumiero, A., Lapouge, K., Bange, G., Kopp, J., & Sinning, I. (2017). Structural basis of  
512 HypK regulating N-terminal acetylation by the NatA complex. *Nature Communications*, *8*,  
513 15726. <https://doi.org/10.1038/ncomms15726>

514 Wong, W.-R., Brugman, K. I., Maher, S., Oh, J. Y., Howe, K., Kato, M., & Sternberg, P. W. (2019).  
515 Autism-associated missense genetic variants impact locomotion and neurodevelopment in  
516 *Caenorhabditis elegans*. *Human Molecular Genetics*, *28*(13), 2271–2281.  
517 <https://doi.org/10.1093/hmg/ddz051>

518 Wu, Y., & Lyon, G. J. (2018). NAA10-related syndrome. *Experimental & Molecular Medicine*, *50*(7), 1–  
519 10. <https://doi.org/10.1038/s12276-018-0098-x>

520 Yubero, D., Martorell, L., Nunes, T., Lyon, G. J., & Ortigoza-Escobar, J. D. (2022). Neurodevelopmental  
521 Gene-Related Dystonia: A Pediatric Case with NAA15 Variant. *Movement Disorders: Official*  
522 *Journal of the Movement Disorder Society*, *37*(11), 2320–2321.  
523 <https://doi.org/10.1002/mds.29241>

524 Zhang, Z.-Y., Zhang, J.-L., Zhao, L.-X., Yang, Y., Guo, R., Zhou, N., Liu, Y.-R., & Zheng, G.-P. (2020).  
525 NAA10 promotes proliferation of renal cell carcinoma by upregulating UPK1B. *European*  
526 *Review for Medical and Pharmacological Sciences*, *24*(22), 11553–11560.  
527 [https://doi.org/10.26355/eurrev\\_202011\\_23796](https://doi.org/10.26355/eurrev_202011_23796)

528 Zhao, J. J., Halvardson, J., Zander, C. S., Zaghlool, A., Georgii-Hemming, P., Månsson, E., Brandberg,  
529 G., Sävmarker, H. E., Frykholm, C., Kuchinskaya, E., Thuresson, A.-C., & Feuk, L. (2018).  
530 Exome sequencing reveals NAA15 and PUF60 as candidate genes associated with intellectual

531 disability. *American Journal of Medical Genetics. Part B, Neuropsychiatric Genetics: The*  
532 *Official Publication of the International Society of Psychiatric Genetics*, 177(1), 10–20.  
533 <https://doi.org/10.1002/ajmg.b.32574>  
534 Zhu, R., Chen, M., Luo, Y., Cheng, H., Zhao, Z., & Zhang, M. (2024). The role of N-acetyltransferases in  
535 cancers. *Gene*, 892, 147866. <https://doi.org/10.1016/j.gene.2023.147866>  
536

537 Tables:

538 Table 1. NAA15 Pathogenic Variant Breakdown by Sex

| Pathogenic Variant                | Males     | Females  |
|-----------------------------------|-----------|----------|
| c.0692-1G>T in intron 6           | 1         |          |
| c.139+2T>A: IVS2+2T>A in intron 2 |           | 1        |
| c.2057-2A>G (splice site)         |           | 1        |
| p.Ala585Thr                       | 1         |          |
| p.Ala678Cysfs*3                   | 1         |          |
| p.Arg027Gly                       | 1         |          |
| p.Arg549X                         | 1         |          |
| p.Arg782X                         |           | 1        |
| p.Asn113Ser                       |           | 1        |
| p.Asn362MetfsX36                  | 1         |          |
| p.Asn623Ilefs*                    | 1         |          |
| p.Asn864Ser                       | 1         |          |
| p.Asp0335Glu fs*7                 | 1         |          |
| p.Cys484Arg                       |           | 1        |
| p.Gln0621*                        | 1         |          |
| p.Glu173*                         | 2         |          |
| p.Glu173NfsX54                    | 1         |          |
| p.His080Argfs*17                  | 2         |          |
| p.intronic                        |           | 1        |
| p.Lys0628Glu                      | 1         |          |
| p.splice site variant             | 1         |          |
| p.Trp0083X                        |           | 1        |
| p.Tyr682*                         | 1         |          |
| p.Y333*                           |           | 1        |
| <b>Total: 24</b>                  | <b>18</b> | <b>8</b> |

539



540

541 **Table 2. Vineland ABC and Domain Standard Scores by Sex**

|                      | <b>Communication</b> | <b>Daily Living Skills</b> | <b>Social</b> | <b>Motor</b>  | <b>ABC Standard</b> |
|----------------------|----------------------|----------------------------|---------------|---------------|---------------------|
| <b>Total Average</b> | <b>61.2</b>          | <b>68.9</b>                | <b>70.9</b>   | <b>69.1</b>   | <b>66.7</b>         |
| SD                   | 26.4                 | 20.1                       | 22.7          | 17.4          | 21.1                |
| <b>Female</b>        |                      |                            |               |               |                     |
| <b>Average</b>       | <b>65.3</b>          | <b>72.3</b>                | <b>75.3</b>   | <b>85.2</b>   | <b>71.5</b>         |
| SD                   | 30.9                 | 24.0                       | 24.8          | 11.0          | 25.9                |
| <b>Male Average</b>  | <b>59.4</b>          | <b>67.5</b>                | <b>68.9</b>   | <b>61.1</b>   | <b>64.5</b>         |
| SD                   | 23.8                 | 17.9                       | 21.4          | 14.2          | 18.3                |
| <b>t test</b>        | <b>0.53</b>          | <b>0.51</b>                | <b>0.43</b>   | <b>0.003*</b> | <b>0.35</b>         |

542 \*Asterisk denotes significance (p&lt;.05)

543

544

545

546

547 **Table 3. Correlation Coefficients of Vineland Domain Standard Scores vs Age**

|                                                     | <b>Communication</b> | <b>Daily Living Skills</b> | <b>Social</b> | <b>Motor</b> | <b>ABC</b> |
|-----------------------------------------------------|----------------------|----------------------------|---------------|--------------|------------|
| Female Correlation Coefficient                      | -0.69                | -0.83                      | -0.72         | -0.61        | -0.76      |
| Male Correlation Coefficient                        | 0.10                 | 0.00                       | -0.09         | 0.46         | -0.01      |
| Male Correlation Coefficient excluding ID:NAA15-011 | 0.45                 | 0.54                       | 0.32          | 0.46         | 0.47       |

548

549 **Table 4. Vineland Sub-Domain Standard Scores by Domain and Sex**

|                       | Communication Sub-Domain |             |             | Daily Living Skills Sub-Domain |             |             |
|-----------------------|--------------------------|-------------|-------------|--------------------------------|-------------|-------------|
|                       | Receptive                | Expressive  | Written     | Personal                       | Domestic    | Community   |
| <b>Total Average</b>  | <b>7.97</b>              | <b>8.03</b> | <b>8.63</b> | <b>8.28</b>                    | <b>10.6</b> | <b>8.66</b> |
| SD                    | 4.86                     | 5.48        | 4.78        | 5.16                           | 3.46        | 3.35        |
| <b>Female Average</b> | <b>9.58</b>              | <b>8.42</b> | <b>7.50</b> | <b>9.50</b>                    | <b>10.8</b> | <b>7.90</b> |
| SD                    | 5.19                     | 6.33        | 5.20        | 5.39                           | 4.47        | 3.30        |
| <b>Male Average</b>   | <b>7.26</b>              | <b>7.85</b> | <b>9.08</b> | <b>7.74</b>                    | <b>10.5</b> | <b>8.96</b> |
| SD                    | 4.53                     | 5.05        | 4.52        | 4.96                           | 2.95        | 3.32        |
| <b>t-test</b>         | <b>0.18</b>              | <b>0.77</b> | <b>0.39</b> | <b>0.34</b>                    | <b>0.81</b> | <b>0.41</b> |

550

|                       | Socialization Sub-Domain |                  |             | Motor Sub-Domain |               | Maladaptive Trait Sub-Domain |               |
|-----------------------|--------------------------|------------------|-------------|------------------|---------------|------------------------------|---------------|
|                       | Interpersonal Relations  | Play and Leisure | Coping      | Gross Motor      | Fine Motor    | Internalizing                | Externalizing |
| <b>Total Average</b>  | <b>9.18</b>              | <b>9.15</b>      | <b>10.7</b> | <b>9.22</b>      | <b>9.33</b>   | <b>18.8</b>                  | <b>17.3</b>   |
| SD                    | 4.85                     | 5.16             | 2.99        | 3.21             | 4.41          | 3.61                         | 2.91          |
| <b>Female Average</b> | <b>9.92</b>              | <b>9.92</b>      | <b>10.8</b> | <b>10.8</b>      | <b>14.0</b>   | <b>18.4</b>                  | <b>16.7</b>   |
| SD                    | 5.62                     | 5.33             | 3.01        | 1.67             | 3.61          | 3.37                         | 2.76          |
| <b>Male Average</b>   | <b>8.85</b>              | <b>8.81</b>      | <b>10.6</b> | <b>8.42</b>      | <b>7.00</b>   | <b>19.0</b>                  | <b>17.6</b>   |
| SD                    | 4.42                     | 5.05             | 2.98        | 3.48             | 2.52          | 3.71                         | 2.94          |
| <b>t-test</b>         | <b>0.54</b>              | <b>0.55</b>      | <b>0.84</b> | <b>0.15</b>      | <b>0.003*</b> | <b>0.74</b>                  | <b>0.53</b>   |

551 \*Asterisk denotes significance ( $p < .05$ ) between Male and Female scores

552

553

554 **Table 5. Correlation Coefficients of Vineland Sub-Domain Standard Scores vs Age**

|                                      | <b>Communication Sub-Domain</b> |                   |                | <b>Daily Living Skills Sub-Domain</b> |                 |                  |
|--------------------------------------|---------------------------------|-------------------|----------------|---------------------------------------|-----------------|------------------|
|                                      | <b>Receptive</b>                | <b>Expressive</b> | <b>Written</b> | <b>Personal</b>                       | <b>Domestic</b> | <b>Community</b> |
| Female Correlation Coefficient       | -0.70                           | -0.54             | -0.64          | -0.70                                 | <b>-0.79</b>    | -0.57            |
| Male Correlation Coefficient         | 0.15                            | 0.19              | -0.22          | 0.24                                  | -0.52           | -0.17            |
| Male Correlation excluding NAA15-011 | 0.46                            | 0.51              | 0.06           | 0.58                                  | -0.12           | 0.28             |

555

|                                      | <b>Socialization Sub-Domain</b> |                         |               | <b>Motor Sub-Domain</b> |                   |
|--------------------------------------|---------------------------------|-------------------------|---------------|-------------------------|-------------------|
|                                      | <b>Interpersonal Relations</b>  | <b>Play and Leisure</b> | <b>Coping</b> | <b>Gross Motor</b>      | <b>Fine Motor</b> |
| Female Correlation Coefficient       |                                 | -0.47                   | -0.69         | -0.16                   | <b>-0.80</b>      |
| Male Correlation Coefficient         |                                 | 0.03                    | 0.01          | 0.18                    | -0.09             |
| Male Correlation Excluding NAA15-011 |                                 | 0.38                    | 0.31          | 0.18                    | -0.09             |

556

|                                      | <b>Maladaptive Trait Sub-Domain</b> |                      |
|--------------------------------------|-------------------------------------|----------------------|
|                                      | <b>Internalizing</b>                | <b>Externalizing</b> |
| Female Correlation Coefficient       | 0.66                                | 0.62                 |
| Male Correlation Coefficient         | 0.42                                | 0.21                 |
| Male Correlation Excluding NAA15-011 | 0.42                                | -0.34                |

558

559

560 **Figures:**

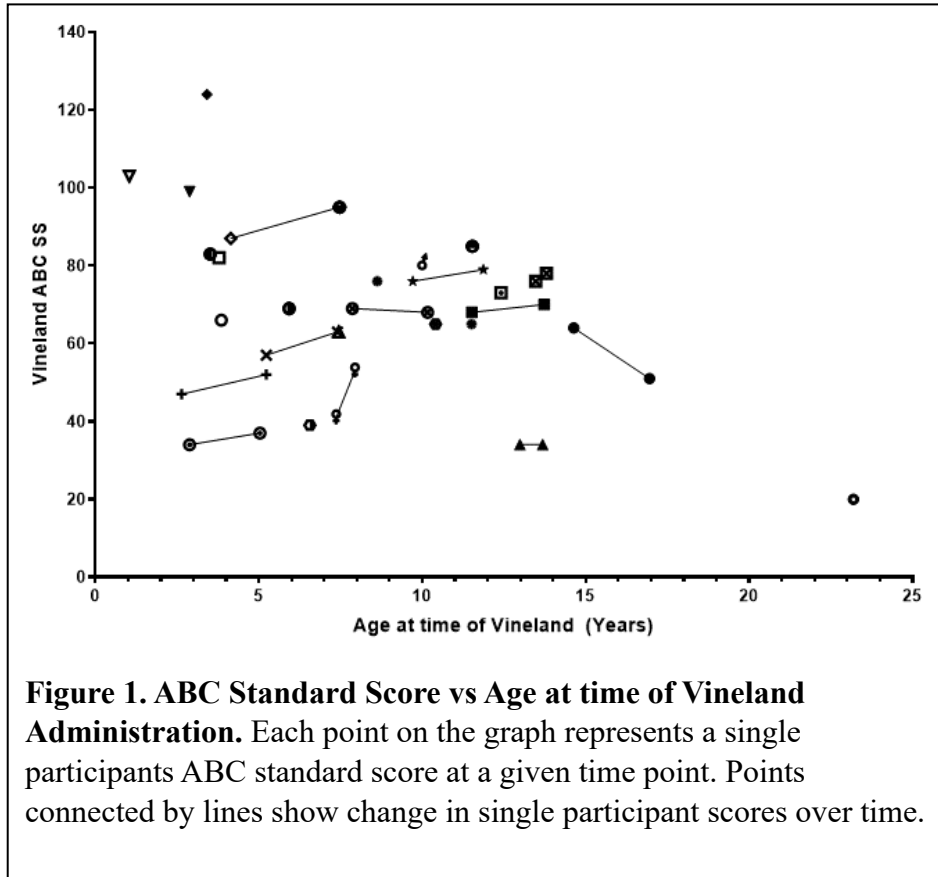

**A**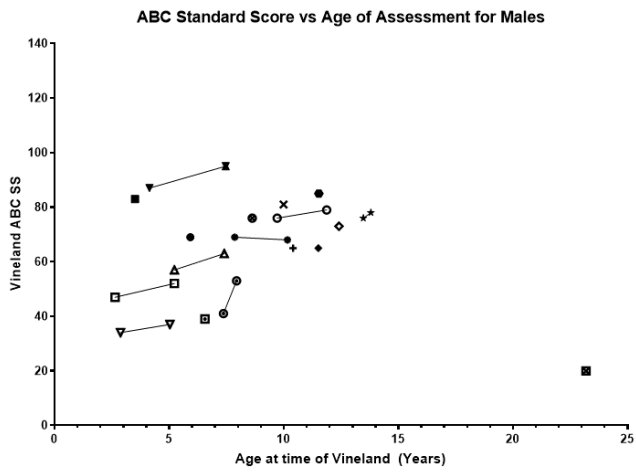**B**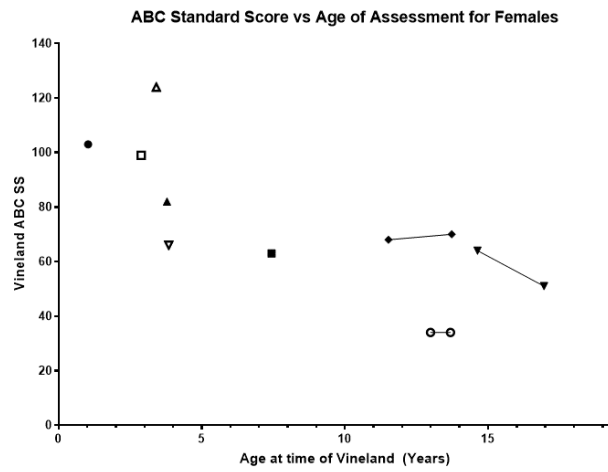

**Figure 2. ABC Standard Score vs Age at time of Vineland Administration by Sex.** Each point on the graph represents a single participants ABC standard score at a given time point. Points connected by lines show change in single participant scores over time.

563

564

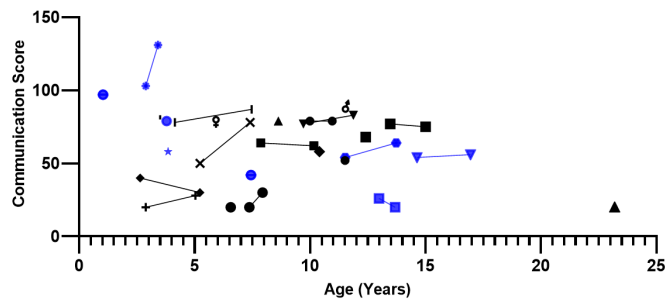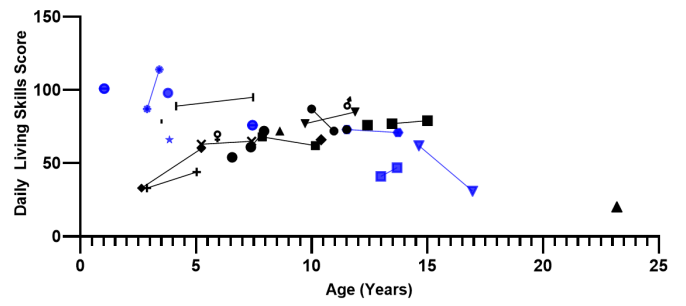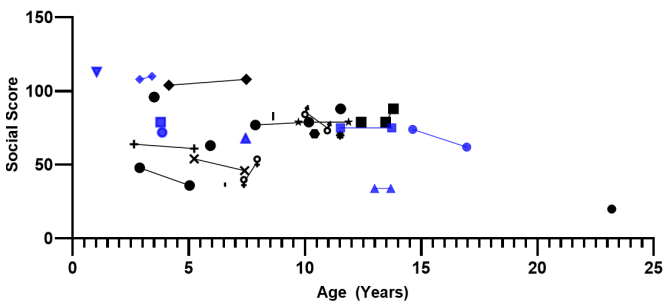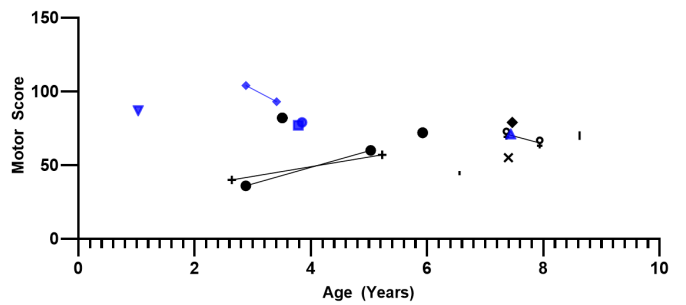

**Figure 3. Vineland Domain Score vs Age at time of Vineland Assessment.** Points in black represent Males. Points in Blue represent Females. Each point on the graph represents a single participant's Vineland Domain standard score at a given time point. Points connected by lines show change in single participant scores over time.

565

566

567

568

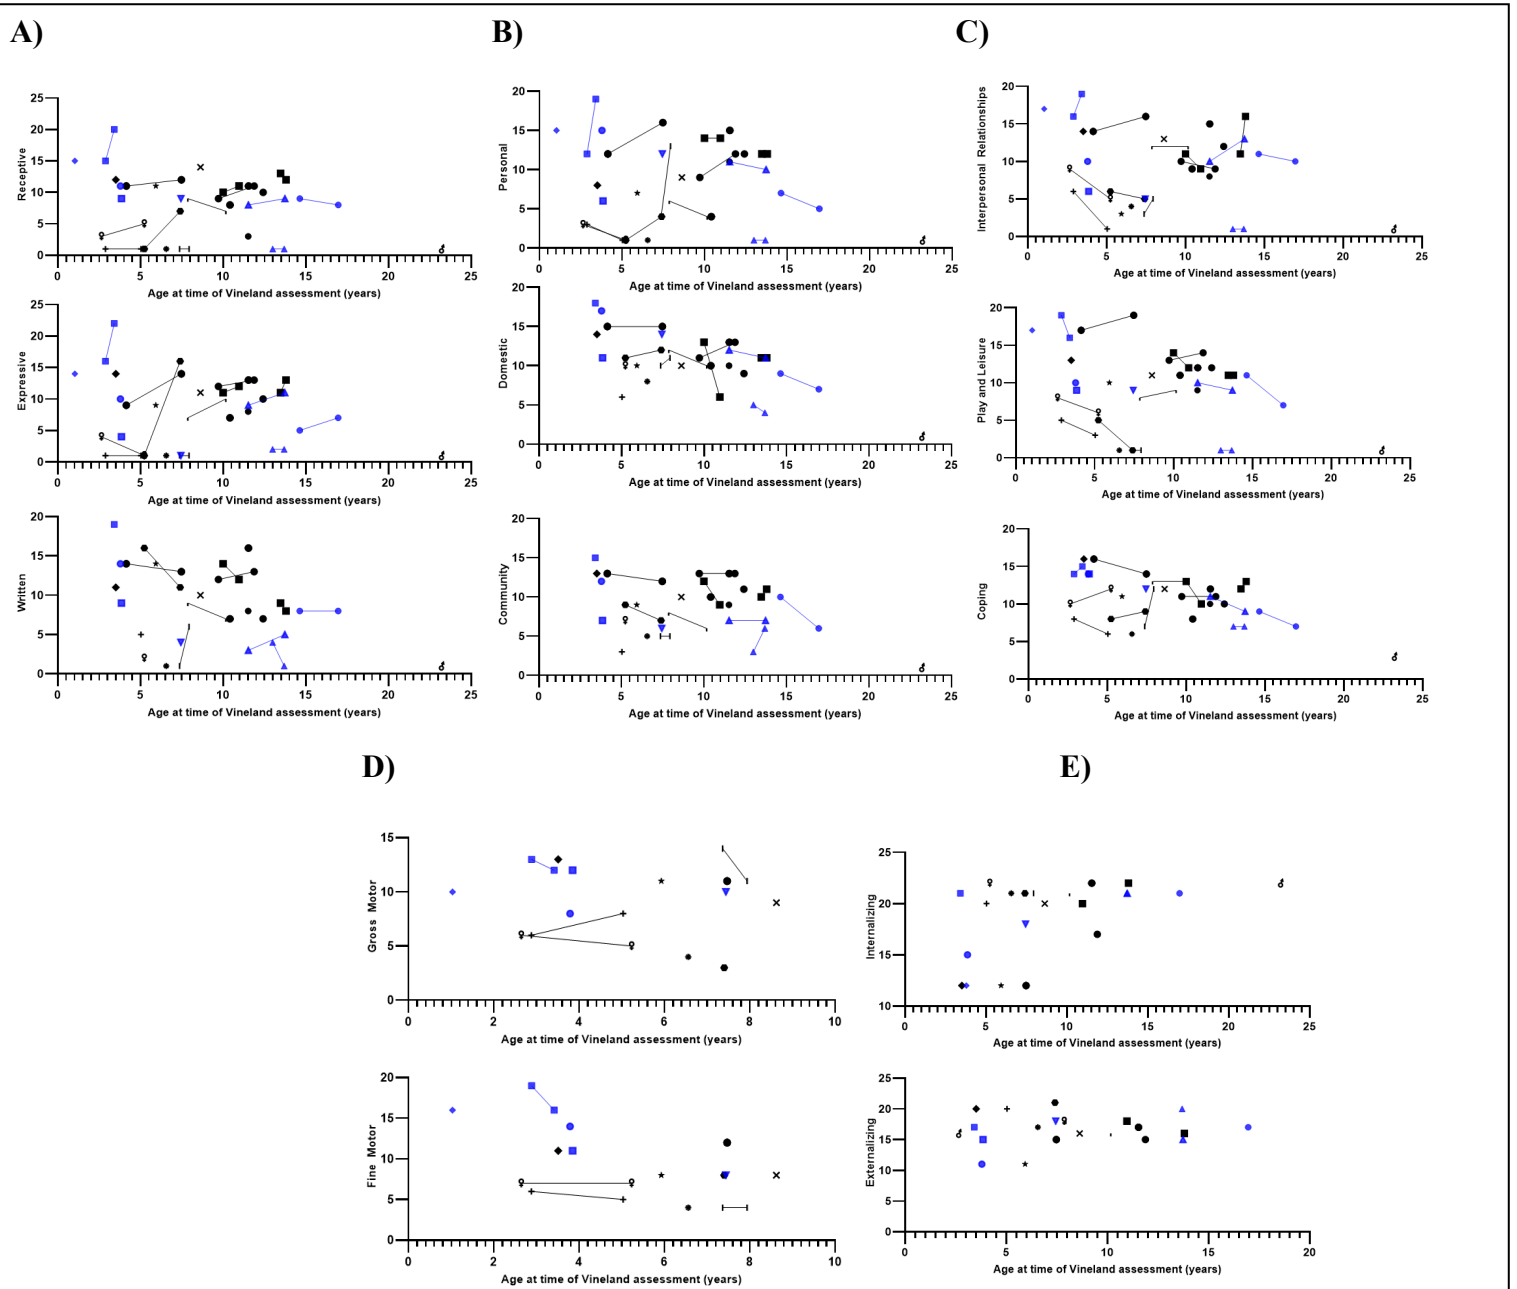

**Figure 4. Vineland Sub-Domain Score vs Age at time of Assessment.** A) Communication Sub-Domain Standard Scores. B) Daily Living Skills Sub-Domain Standard Scores. C) Socialization Sub-Domain Standard Scores. D) Motor Sub-Domain Standard Scores E) Maladaptive Trait Standard Scores. Points in black represent Males. Points in Blue represent Females. Each point on the graph represents a single participant's sub-domain standard score at a given time point. Points connected by lines show change in single participant scores over time.
